# Supplementary material
Source: publisher figshare collection journal article supplement (https://plos.figshare.com/articles/dataset/_/7289477)
Supplement: Supplementary file [file 1]

**Table S6.** Genome region size increases in PSCNV compared to ExoN-containing nidoviruses.

| Region | p, nt <sup>1</sup> | M, nt <sup>2</sup> | m, nt <sup>3</sup> | D <sub>1</sub> , % <sup>4</sup> | D <sub>2</sub> , % <sup>5</sup> | D <sub>3</sub> , % <sup>6</sup> |
|--------|--------------------|--------------------|--------------------|---------------------------------|---------------------------------|---------------------------------|
| genome | 41121              | 33452              | 27608              | 22.9                            | 131.2                           | 100                             |
| ORF1a  | 18384              | 17394              | 12153              | 5.7                             | 18.9                            | 14.4                            |
| ORF1b  | 9834               | 8157               | 8025               | 20.6                            | 1270.5                          | 968.1                           |
| 3'ORFs | 12453              | 10771              | 6970               | 15.6                            | 44.3                            | 33.7                            |

<sup>1</sup>Region size in PSCNV.

<sup>2</sup>Maximum region size in ExoN-containing nidoviruses.

<sup>3</sup>Median region size in ExoN-containing nidoviruses.

<sup>4</sup> $D_1(\text{region}) = (p - M) / M * 100\%$ , PSCNV region size increase calculated accounting for the region size of ExoN-containing nidoviruses.

<sup>5</sup> $D_2(\text{region}) = (p - M) / (M - m) * 100\%$ , PSCNV region size increase calculated accounting for the region size variation of ExoN-containing nidoviruses.

<sup>6</sup> $D_3(\text{region}) = D_2(\text{region}) / D_2(\text{genome}) * 100\%$ , PSCNV region size increase calculated accounting for the region size variation of ExoN-containing nidoviruses and PSCNV genome size increase.
