# Supplementary material
Source: publisher figshare collection journal article supplement (https://plos.figshare.com/articles/dataset/_/7289477)
Supplement: Supplementary file [file 1]

**Table S1.** Genome sequences and size characteristics of representatives of nidovirus species used in bioinformatics analyses.

| (Sub)family   | Species                                                      | Acronym        | Accession number | Genome, nt | Genome region, nt |       |        |
|---------------|--------------------------------------------------------------|----------------|------------------|------------|-------------------|-------|--------|
|               |                                                              |                |                  |            | ORF1a             | ORF1b | 3'ORFs |
| Arteriviridae | <i>Equine arteritis virus</i>                                | EAV            | X53459.3         | 12704      | 5181              | 4347  | 2894   |
| Arteriviridae | <i>Lactate dehydrogenase-elevating virus</i>                 | LDV            | U15146.1         | 14104      | 6615              | 4236  | 3018   |
| Arteriviridae | <i>Porcine respiratory and reproductive syndrome virus 1</i> | PRRSV-1        | M96262.2         | 15111      | 7185              | 4380  | 3199   |
| Arteriviridae | <i>Porcine respiratory and reproductive syndrome virus 2</i> | PRRSV-2        | U87392.3         | 15411      | 7506              | 4377  | 3189   |
| Arteriviridae | <i>Simian hemorrhagic fever virus</i>                        | SHFV           | AF180391.2       | 15717      | 6312              | 4476  | 4634   |
| Arteriviridae | <i>Kibale red-tailed guenon virus 1</i>                      | KRTGV          | JX473849.1       | 15264      | 6177              | 4476  | 4379   |
| Arteriviridae | <i>Kibale red colobus virus 1</i>                            | KRCV-1         | KC787630.1       | 15446      | 6141              | 4395  | 4678   |
| Arteriviridae | <i>Kibale red colobus virus 2</i>                            | KRCV-2         | KC787658.1       | 15596      | 6153              | 4458  | 4530   |
| Arteriviridae | <i>Mikumi yellow baboon virus 1</i>                          | MYBV-1         | KM110938.1       | 14927      | 6165              | 4461  | 4101   |
| Arteriviridae | <i>Simian hemorrhagic encephalitis virus</i>                 | SHEV           | KM677927.1       | 15370      | 6270              | 4401  | 4385   |
| Arteriviridae | <i>DeBrazza's monkey arterivirus</i>                         | DeMAV          | KP126831.1       | 15684      | 6249              | 4503  | 4622   |
| Arteriviridae | <i>Pebjah virus</i>                                          | PBJV           | KR139839.1       | 15478      | 6183              | 4452  | 4615   |
| Arteriviridae | <i>African pouched rat arterivirus</i>                       | APRAV          | KP026921.1       | 14953      | 6717              | 4353  | 3400   |
| Arteriviridae | <i>Wobbly possum disease virus</i>                           | WPDV           | JN116253.3       | 12917      | 5973              | 4236  | 2351   |
| Coronavirinae | <i>Alphacoronavirus 1</i>                                    | TGEV           | AJ271965.2       | 28586      | 12024             | 8031  | 7939   |
| Coronavirinae | <i>Human coronavirus 229E</i>                                | HCoV_229E      | AF304460.1       | 27317      | 12228             | 8049  | 6287   |
| Coronavirinae | <i>Human coronavirus NL63</i>                                | HCoV_NL63      | AY567487.1       | 27553      | 12153             | 8037  | 6791   |
| Coronavirinae | <i>Miniopterus bat coronavirus 1</i>                         | Mi-BatCoV_1A   | EU420138.1       | 28326      | 12777             | 8022  | 6970   |
| Coronavirinae | <i>Miniopterus bat coronavirus HKU8</i>                      | Mi-BatCoV_HKU8 | EU420139.1       | 28773      | 12666             | 8025  | 7575   |
| Coronavirinae | <i>Porcine epidemic diarrhea virus</i>                       | PEDV           | AF353511.1       | 28033      | 12324             | 8022  | 7169   |
| Coronavirinae | <i>Rhinolophus bat coronavirus HKU2</i>                      | Rh-BatCoV_HKU2 | EF203065.1       | 27164      | 12150             | 8034  | 6428   |
| Coronavirinae | <i>Scotophilus bat coronavirus 512</i>                       | Sc-BatCoV_512  | DQ648858.1       | 28203      | 12357             | 8025  | 7286   |
| Coronavirinae | <i>Bat coronavirus HKU10</i>                                 | BtCoV_HKU10    | JQ989271.1       | 28489      | 12318             | 8028  | 7596   |
| Coronavirinae | <i>Bat coronavirus CDPHE15</i>                               | BtCoV_CDPHE15  | KF430219.1       | 28035      | 12453             | 8025  | 7109   |
| Coronavirinae | <i>Mink coronavirus 1</i>                                    | MCoV           | HM245925.1       | 28941      | 12027             | 8022  | 8327   |
| Coronavirinae | <i>Betacoronavirus 1</i>                                     | HCoV_OC43      | AY585228.1       | 30741      | 13131             | 8157  | 8929   |
| Coronavirinae | <i>Human coronavirus HKU1</i>                                | HCoV_HKU1      | AY597011.1       | 29942      | 13395             | 8154  | 7892   |
| Coronavirinae | <i>Murine coronavirus</i>                                    | MHV            | AF201929.1       | 31276      | 13230             | 8145  | 9378   |
| Coronavirinae | <i>Pipistrellus bat coronavirus HKU5</i>                     | Pi-BatCoV_HKU5 | EF065509.1       | 30482      | 13425             | 8124  | 8353   |

| (Sub)family          | Species                                                      | Acronym        | Accession number        | Genome, nt | Genome region, nt |       |        |
|----------------------|--------------------------------------------------------------|----------------|-------------------------|------------|-------------------|-------|--------|
|                      |                                                              |                |                         |            | ORF1a             | ORF1b | 3'ORFs |
| <i>Coronavirinae</i> | <i>Rousettus bat coronavirus HKU9</i>                        | Ro-BatCoV_HKU9 | EF065513.1              | 29114      | 12687             | 8070  | 7862   |
| <i>Coronavirinae</i> | <i>Severe acute respiratory syndrome-related coronavirus</i> | SARS-CoV       | AY274119.3 <sup>1</sup> | 29751      | 13134             | 8088  | 7903   |
| <i>Coronavirinae</i> | <i>Tylonycteris bat coronavirus HKU4</i>                     | Ty-BatCoV_HKU4 | EF065505.1              | 30286      | 13284             | 8076  | 8343   |
| <i>Coronavirinae</i> | <i>Middle East respiratory syndrome-related coronavirus</i>  | MERS-CoV       | JX869059.2              | 30119      | 13155             | 8082  | 8293   |
| <i>Coronavirinae</i> | <i>Hedgehog coronavirus 1</i>                                | EriCoV         | KC545383.1              | 30148      | 13344             | 8109  | 8134   |
| <i>Coronavirinae</i> | <i>Avian coronavirus</i>                                     | IBV            | M95169.1                | 27608      | 11826             | 8064  | 6685   |
| <i>Coronavirinae</i> | <i>Beluga whale coronavirus SW1</i>                          | BWCoV          | EU111742.1              | 31686      | 11865             | 8127  | 10771  |
| <i>Coronavirinae</i> | <i>Bulbul coronavirus HKU11</i>                              | BuCoV_HKU11    | FJ376619.2              | 26487      | 10746             | 8049  | 6867   |
| <i>Coronavirinae</i> | <i>Thrush coronavirus HKU12</i>                              | ThCoV_HKU12    | FJ376621.1              | 26396      | 10812             | 8049  | 6722   |
| <i>Coronavirinae</i> | <i>Munia coronavirus HKU13</i>                               | MuCoV_HKU13    | FJ376622.1              | 26552      | 10998             | 7926  | 6812   |
| <i>Coronavirinae</i> | <i>Coronavirus HKU15</i>                                     | PoCoV_HKU15    | JQ065043.1              | 25432      | 10875             | 7929  | 5866   |
| <i>Coronavirinae</i> | <i>White-eye coronavirus HKU16</i>                           | WECov_HKU16    | JQ065044.1              | 26041      | 10839             | 8049  | 6420   |
| <i>Coronavirinae</i> | <i>Night heron coronavirus HKU19</i>                         | NHCoV_HKU19    | JQ065047.1              | 26077      | 10830             | 8013  | 6553   |
| <i>Coronavirinae</i> | <i>Wigeon coronavirus HKU20</i>                              | WiCoV_HKU20    | JQ065048.1              | 26227      | 10704             | 7917  | 7114   |
| <i>Coronavirinae</i> | <i>Common moorhen coronavirus HKU21</i>                      | CMCoV_HKU21    | JQ065049.1              | 26223      | 10584             | 8043  | 6813   |
| <i>Torovirinae</i>   | <i>Bovine torovirus</i>                                      | BRV            | AY427798.1              | 28475      | 13332             | 6870  | 7219   |
| <i>Torovirinae</i>   | <i>Porcine torovirus</i>                                     | PToV           | JQ860350.1              | 28301      | 13248             | 6870  | 7199   |
| <i>Torovirinae</i>   | <i>White bream virus</i>                                     | WBV            | DQ898157.1              | 26660      | 13599             | 6969  | 4877   |
| <i>Torovirinae</i>   | <i>Fathead minnow nidovirus 1</i>                            | FHMNV          | GU002364.2              | 27318      | 14565             | 6960  | 4813   |
| <i>Torovirinae</i>   | <i>Ball python nidovirus 1</i>                               | BPNV           | KJ541759.1              | 33452      | 17394             | 6933  | 7170   |
| <i>Mesoniviridae</i> | <i>Alphamesonivirus 1</i>                                    | NDiV           | DQ458789.2              | 20192      | 7491              | 7788  | 3466   |
| <i>Mesoniviridae</i> | <i>Alphamesonivirus 2</i>                                    | KSaV           | KC807171.1              | 20795      | 8073              | 7788  | 3519   |
| <i>Mesoniviridae</i> | <i>Alphamesonivirus 3</i>                                    | DKNV           | AB753015.2              | 20307      | 7644              | 7782  | 3493   |
| <i>Mesoniviridae</i> | <i>Alphamesonivirus 4</i>                                    | CASV           | KJ125489.1              | 19917      | 7416              | 7782  | 3448   |
| <i>Mesoniviridae</i> | <i>Alphamesonivirus 5</i>                                    | HanaV          | JQ957872.1              | 20070      | 7488              | 7776  | 3447   |
| <i>Mesoniviridae</i> | <i>Mesonivirus 1</i>                                         | NseV           | JQ957874.1              | 20074      | 7482              | 7791  | 3488   |
| <i>Mesoniviridae</i> | <i>Mesonivirus 2</i>                                         | MenoV          | JQ957873.1              | 19979      | 7404              | 7791  | 3463   |
| <i>Roniviridae</i>   | <i>Gill-associated virus</i>                                 | GAV            | AF227196.2              | 26253      | 12153             | 7869  | 5508   |

<sup>1</sup>To generate Fig. S12 and S13, GU553365.1 was used; to generate Fig. S14 – AY394850.2
