# Supplementary material
Source: publisher figshare collection journal article supplement (https://plos.figshare.com/articles/dataset/_/7289477)
Supplement: Supplementary file [file 1]

**Table S2.** Primers used for viral genome detection, 5'-RACE, and genome-wide overlapping amplification.

| Primer name         | Region                   | Sequence                  | Paired with      | Amplicon size (bp) | Purpose          |
|---------------------|--------------------------|---------------------------|------------------|--------------------|------------------|
| PSCNV-detect-fwd    | 36764..36782             | AGGTGGTTATGGATGGTGT       | PSCNV-detect-rev | 1047               | Genome detection |
| PSCNV-detect-rev    | complement(37793..37810) | GGTGATTGATTGCGTGGT        |                  |                    |                  |
| PSCNV-FPR-rev-606   | complement(584..606)     | AGACACCATCTCTTTCCATTTGT   | RLM-RACE kit     | 606                | Genomic 5'-RACE  |
| PSCNV-FPR-rev-763   | complement(744..763)     | GCTATATCACCTTGGTCGCC      | RLM-RACE kit     | 763                | Genomic 5'-RACE  |
| PSCNV-FPR-rev-28815 | complement(28796..28815) | CCAAATCGGTCAAAATTCGT      | RLM-RACE kit     | 429                | Sg 5'-RACE       |
| PSCNV-FPR-rev-29433 | complement(29414..29433) | TGTCGCTTGGCATAAGTTCA      | RLM-RACE kit     | 1047               | Sg 5'-RACE       |
| PSCNV-FPR-fwd-171   | 182..201                 | ACGAAAGGATGGCGTTCAAA      | PSCNV-BlpI-rev   | 3456               | Large amplicon 1 |
| PSCNV-BlpI-rev      | complement(3618..3637)   | ACATGGGCATCTGTGAACAT      |                  |                    |                  |
| PSCNV-BlpI-fwd      | 3234..3258               | AGAATCCAATCATATCGACGAATTC | PSCNV-BglI-rev   | 6758               | Large amplicon 2 |
| PSCNV-BglI-rev      | complement(9971..9991)   | TCATCTGAACAACCTGTTGCT     |                  |                    |                  |
| PSCNV-BglI-fwd      | 9633..9653               | GGAGCACCGTTGACATCATAT     | PSCNV-BstEII-rev | 8101               | Large amplicon 3 |
| PSCNV-BstEII-rev    | complement(17714..17733) | CGATAGCGGCAACAATCGAA      |                  |                    |                  |
| PSCNV-BstEII-fwd    | 17182..17201             | TAAACAGCCCACCACCAACA      | PSCNV-MluI-rev   | 4194               | Large amplicon 4 |
| PSCNV-MluI-rev      | complement(21375..21395) | AGAACTTTGGTCATGTCGTGT     |                  |                    |                  |
| PSCNV-MluI-fwd      | 21076..21097             | TGGGTGAGCTAATGAATTGTGT    | PSCNV-AgeI-rev   | 7019               | Large amplicon 5 |
| PSCNV-AgeI-rev      | complement(28072..28094) | AATAAAAGCCTCAGTGCTCAAAC   |                  |                    |                  |
| PSCNV-AgeI-fwd      | 27539..27559             | AAAGATGGGACGTGGTGGATT     | PSCNV-StuI-rev   | 4416               | Large amplicon 6 |
| PSCNV-StuI-rev      | complement(31935..31954) | GCCCAATCAAACAAGCCTGC      |                  |                    |                  |
| PSCNV-StuI-fwd      | 31416..31436             | CCAACAACACAACCTTCGGACA    | PSCNV-SacI-rev   | 6114               | Large amplicon 7 |
| PSCNV-SacI-rev      | complement(37509..37529) | TCCACCACGGAAAAATACTCG     |                  |                    |                  |
