# Supplementary material
Source: publisher figshare collection journal article supplement (https://plos.figshare.com/articles/dataset/_/7289477)
Supplement: Supplementary file [file 1]

**Table S5.** Domain identification in PSCNV polyprotein through comparison with various protein databases using HHsearch (see Fig. S3 for outline).

| Domain   | Iteration <sup>1</sup> | Index <sup>2</sup> | Database <sup>3</sup> | Hit                                       |             |          |                        |                        |                           |
|----------|------------------------|--------------------|-----------------------|-------------------------------------------|-------------|----------|------------------------|------------------------|---------------------------|
|          |                        |                    |                       | Name <sup>4</sup>                         | Probability | E-value  | PSCNV coo <sup>5</sup> | PSCNV len <sup>6</sup> | Template HMM <sup>7</sup> |
| RNase T2 | I                      | a                  | pfam*                 | PF00445, Ribonuclease_T2                  | 80          | 0.18     | 3133–3226              | 94                     | 6–107 (178)               |
| 3CLpro   | I                      | b                  | pdb                   | 3k6y_A, Serine_protease                   | 73.3        | 39       | 4462–4491              | 30                     | 55–79 (237)               |
|          | I                      | 1                  | scop                  | d2o8la1, V8 protease                      | 95.5        | 0.032    | 4545–4641              | 97                     | 90–188 (216)              |
|          | I                      | c                  | pfam*                 | 3CLproCore_CoToMeRo                       | 2.8         | 420      | 4605–4636              | 32                     | 132–158 (187)             |
| NiRAN    | II                     | 2                  | pfam*                 | NiRAN_CoToMeRo                            | 95.1        | 0.0073   | 6226–6406              | 181                    | 34–198 (202)              |
| RdRp     | I                      | 3                  | pfam*                 | RdRpCore_CoToMeRo                         | 99.1        | 1.00E-09 | 6639–7133              | 495                    | 7–450 (457)               |
| ZBD      | II                     | d                  | pfam*                 | PF14569, Zinc-binding RING-finger         | 35          | 2.6      | 7387–7438              | 52                     | 17–64 (77)                |
|          | II                     | e                  | pfam*                 | ZBD_CoToMeRo                              | 22.7        | 39       | 7395–7460              | 66                     | 13–64 (80)                |
| HEL1     | I                      | 4                  | pfam*                 | HEL1_CoToMeRo                             | 99.9        | 7.50E-28 | 7719–8044              | 326                    | 2–307 (319)               |
| ExoN     | II                     | f                  | scop                  | d1w0ha, human DEDDh 3'-5'-exoribonuclease | 26.2        | 12       | 8342–8446              | 105                    | 7–95 (200)                |
|          | II                     | g                  | pfam*                 | ExoN_CoToMeRo                             | 4.2         | 240      | 8449–8560              | 112                    | 98–168 (205)              |
|          | II                     | h                  | pdb                   | 3mxm_B, TREX1 3' Exonuclease              | 39.1        | 14       | 8598–8631              | 34                     | 178–211 (242)             |
| N-MT     | II                     | i                  | pfam*                 | PF07091, Ribosomal RNA methyltransferase  | 80.8        | 0.19     | 8636–8708              | 73                     | 46–134 (243)              |
|          | II                     | j                  | pfam*                 | NMT_CoMeRo                                | 0.8         | 1200     | 8659–8686              | 28                     | 24–54 (238)               |
| O-MT     | IVb                    | 5                  | pfam*                 | OMT_CoToMeRo                              | 96.6        | 0.00033  | 9237–9407              | 171                    | 122–280 (305)             |
| FN2a     | I                      | k                  | pfam*                 | PF00040, Fibronectin type II domain       | 91.3        | 0.026    | 10561–10611            | 51                     | 2–42 (42)                 |
| ANK      | I                      | 6                  | pdb                   | 2rfa_A, ankyrin repeat domain of TRPV6    | 98.9        | 3.30E-08 | 11394–11555            | 162                    | 35–218 (232)              |
| FN2b     | I                      | l                  | pfam*                 | PF00040, Fibronectin type II domain       | 78.5        | 0.35     | 12191–12231            | 41                     | 1–42 (42)                 |

<sup>1</sup>Iteration of HHsearch-based procedure during which hit was obtained.

<sup>2</sup>Index of cluster of significant hits (numeric, black font) or individual sub-significant hit (letter, grey font). For each cluster of significant hits, only the top hit is presented in the table.

<sup>3</sup>Databases: pfam\*, pfamA\_28.0 extended to include eight nidovirus domains; pdb, pdb70\_06Sep14; scop, scop70\_1.75.

<sup>4</sup>Names of nidoviral domains that were added to pfamA\_28.0 have suffixes \_CoToMeRo or \_CoMeRo (each syllable designates a (sub)family of nidoviruses, included in the profile).

<sup>5</sup>Coordinates of hit in residues of PSCNV polyprotein.

<sup>6</sup>Length of hit in residues of PSCNV polyprotein.

<sup>7</sup>Coordinates of hit in match states of HMM profile from database. Number of match states in HMM profile is shown in parentheses.
