# Supplementary material
Source: publisher figshare collection journal article supplement (https://plos.figshare.com/articles/dataset/_/7289477)
Supplement: Supplementary file [file 1]

**Table S4.** PSCNV genome sequence variants in the 28389–41000 nt region<sup>1</sup>.

| Reference         |    |    | PRJNA319973 |    |    | PRJNA79031 |    |    | PRJNA421285 |    |    |
|-------------------|----|----|-------------|----|----|------------|----|----|-------------|----|----|
| genome coordinate | nt | aa | p-value     | nt | aa | p-value    | nt | aa | p-value     | nt | aa |
| 31585             | U  | I  | 3.20E-23    | C  | T  | 3.20E-23   | C  | T  | 3.20E-23    | C  | T  |
| 31828             | A  | H  |             | *  | *  |            | *  | *  | 4.00E-19    | G  | R  |
| 35506             | G  | R  |             | *  | *  |            | *  | *  | 3.20E-23    | A  | K  |
| 35714             | G  | Q  |             | *  | *  |            | *  | *  | 3.20E-23    | A  | *  |
| 37558             | G  | R  |             | *  | *  |            | *  | *  | 0.031       | A  | H  |
| 37648             | A  | Q  |             | *  | *  |            | *  | *  | 3.20E-23    | C  | P  |
| 39112             | U  | I  |             | *  | *  |            | *  | *  | 3.20E-23    | C  | T  |
| 39185             | U  | F  |             | *  | *  |            | *  | *  | 3.20E-23    | C  | *  |
| 40748             | C  | Y  |             | *  | *  |            | *  | *  | 1.30E-20    | U  | *  |

<sup>1</sup>Asterisks indicate nt/aa identical to the reference.
