# Supplementary material
Source: publisher figshare collection journal article supplement (https://plos.figshare.com/articles/dataset/_/7289477)
Supplement: Supplementary file [file 1]

**Table S3.** *S. mediterranea* RNA-seq datasets screened for presence of PSCNV reads.

| Laboratory       | Strain  | BioProject  | Sequencing experiments |                  | PSCNV reads, ppm <sup>1</sup> |
|------------------|---------|-------------|------------------------|------------------|-------------------------------|
|                  |         |             | All                    | With PSCNV reads |                               |
| Aboobaker        | Asexual | PRJNA79649  | 1 <sup>2</sup>         | 0                | 0                             |
| Bartscherer      | Asexual | PRJNA222859 | 8                      | 0                | 0                             |
| Graveley         | Asexual | PRJNA151483 | 3                      | 2                | 10                            |
| Graveley         | Sexual  | PRJNA151483 | 6                      | 6                | 69                            |
| Newmark          | Asexual | PRJNA319973 | 15                     | 15               | 19                            |
| Newmark          | Sexual  | PRJNA79031  | 4                      | 4                | 1834                          |
| Pearson          | Asexual | PRJNA205281 | 9                      | 0                | 0                             |
| Pearson          | Asexual | PRJNA415947 | 5                      | 0                | 0                             |
| Rajewsky         | Asexual | PRJNA79997  | 4                      | 0                | 0                             |
| Reddien          | Asexual | PRJNA320389 | 8                      | 0                | 0                             |
| Rink             | Asexual | PRJNA208294 | 8                      | 0                | 0                             |
| Sanchez Alvarado | Asexual | PRJNA215411 | 1                      | 0                | 0                             |
| Sanchez Alvarado | Sexual  | PRJNA215411 | 1                      | 0                | 0                             |
| Sanchez Alvarado | Sexual  | PRJNA324545 | 40                     | 0 <sup>3</sup>   | 0                             |
| Sanchez Alvarado | Sexual  | PRJNA421285 | 32                     | 32               | 1258                          |
| Sanchez Alvarado | Sexual  | PRJNA421831 | 15                     | 0                | 0                             |

<sup>1</sup>Number of reads mapped to the PSCNV reference genome sequence per million reads in the dataset.

<sup>2</sup>Data obtained using ABI SOLiD sequencing platform (5 runs) were not analyzed.

<sup>3</sup>A single read from SRR3629921 run mapped to the PSCNV genome and was considered an artefact.
